# Supplementary material
Source: publisher figshare collection journal article supplement (https://adisjournals.figshare.com/articles/dataset/_/20481465)
Supplement: Supplementary file 1 [file 1]

# What are the rash and pain characteristics in adults who received placebo instead of RZV vaccination?

**Shingles is a viral disease** caused by the reactivation of the varicella virus in adults.

Symptoms include **pain and rash** that shows up on one or more areas of the body.

Herpes zoster risk is associated with a decline in the immune system function, linked to or due to:

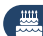

Aging

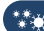

Immunodeficiency

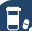

Immunosuppression due to disease or therapy

## EVALUATION OF THE BURDEN OF HERPES ZOSTER

Analysis of the **placebo group** data from 3 randomized phase III studies

**Immuno-competent individuals**  
aged  $\geq 50$  and  $\geq 70$  years of age (YOA)

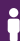

$\geq 50$  YOA (N=280)

ZOE-50

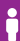

$\geq 70$  YOA (N=240)

ZOE-70

**Immunocompromised subjects** <sup>(1)</sup>

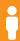

$\geq 18$  YOA (N=172)

HSCT recipients

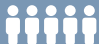

**PLACEBO RECIPIENTS**

692 subjects with a confirmed HZ episode evaluated

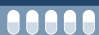

All subjects received a Placebo

Analysis of:

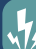

Herpes zoster pain

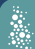

Herpes zoster rash distribution

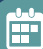

Interference with activities of daily living

## PAIN

ZOE-50  
ZOE-70  
HSCT

(1) Immunocompromised include immunodeficient and immunosuppressed populations

Is the pain **PRESENT** ?

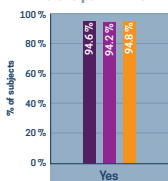

What is the pain **INTENSITY** ?

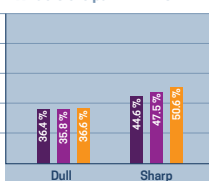

What is the pain **VARIABILITY** ?

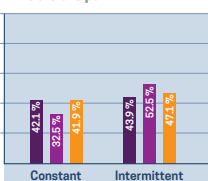

What is the **MAXIMUM WORST PAIN SCORE** ?

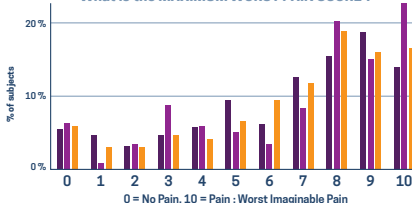

Duration of **CLINICALLY SIGNIFICANT PAIN**

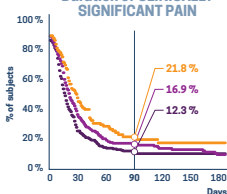

## RASH

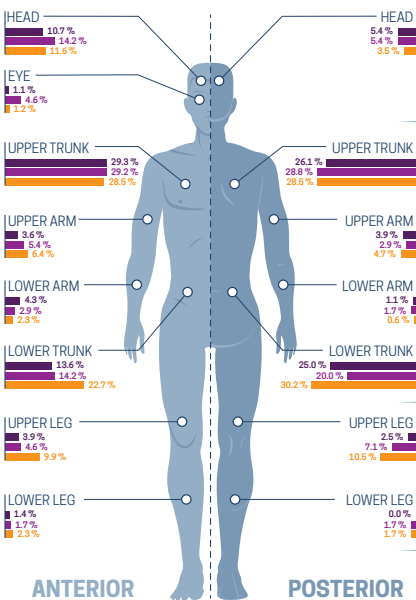

### Consequences

**Vision problems** when the trigeminal nerve is involved.

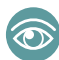

**Thoracic dermatomal rash** was more frequent. Involvement of adjacent/contiguous dermatomes and/or multi-dermatomal involvement was reported in **over 20% of cases**.

**Walking problems** impacting physical functioning and activities of daily living.

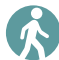

Most older adults who developed HZ reported severe pain, while immunocompromised individuals were at a greater risk of developing post-herpetic neuralgia.

Overall, the burden of herpes zoster was high in immunocompetent individuals aged  $\geq 50$  years and even more so in immunocompromised adults.

Natural History of Herpes Zoster in the Placebo Groups of Three Randomized Phase III Clinical Trials.  
Curran D, Matthews S, Boutry C, Lecrenier N, Cunningham AL, Schmader K

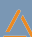

Adis

OPEN ACCESS

PEER-REVIEWED  
PLAIN LANGUAGE SUMMARY

The graphical abstract represents the opinions of the authors. For a full list of declarations, including funding and author disclosure statements, and copyright information, please see the full text online.
